# Supplementary material for: A silver and manganese dioxide composite with oxygen vacancies as a high-performance cathode material for aqueous zinc-ion batteries
Source: Royal Society of Chemistry journal article supplement (doi:10.1039/d4dt00044g), 2024-01-01
Supplement: d4dt00044g1.pdf [file d4dt00044g1.pdf]

# Silver and Manganese Dioxide composite with Oxygen Vacancies as a high-performance cathode material for an aqueous zinc-ion battery

Yun Wang<sup>[a]</sup>, Tengfei Wang<sup>[a]</sup>, Wenjing Zhang<sup>[a]</sup>, Liangjun Li<sup>[b]</sup>, Xiaoxia Lv<sup>\*[a]</sup>, Hua Wang<sup>[c]</sup>

[a] Key Laboratory of Catalytic Conversion and Clean Energy in Universities of Shandong Province, School of Chemistry and Chemical Engineering, Qufu Normal University, Qufu, Shandong, P.R. China

[b] College of New Energy, China University of Petroleum (East China), Qingdao, Shandong Province, P. R. China

[c] School of Life Sciences, Huzhou University, Huzhou, Zhejiang 313000, P. R. China

## Supplementary Figures

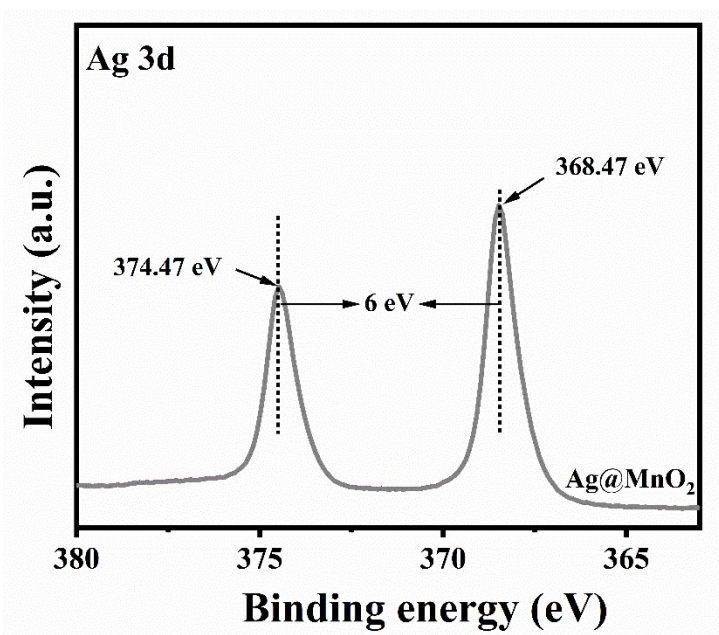

Figure S1 Ag3d XPS spectrum of Ag@MnO<sub>2</sub>

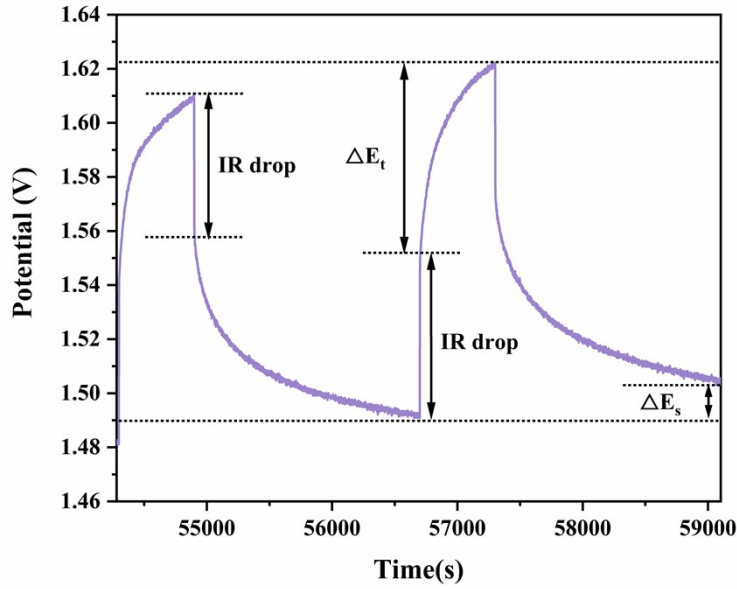

**Figure S2** Enlarged parts of the GITT curves at the two platforms of the charge process.

In our GITT study, a cell was charged or discharged at 100 mA g<sup>-1</sup> rate for 10 min, followed by a 30 min open circuit step to allow relaxation back to equilibrium. The procedure was continued until the charge (or discharge) voltage reached 1.9 V (0.9 V). The Zn<sup>2+</sup> diffusion coefficients could be calculated using the following equation first outlined by Weppner and Huggins:

$$D = \frac{4}{\pi} \left( \frac{V_m}{Z_A F S} \right)^2 \left( \frac{dE/d\delta}{dE/d\sqrt{t}} \right)^2$$

where  $I$  is the current (A);  $V_m$  is the molar volume of the WBEC (cm<sup>3</sup> mol<sup>-1</sup>);  $Z_A$  is the charge number;  $F$  is the Faraday's constant (96485 C mol<sup>-1</sup>);  $S$  is the electrode/electrolyte contact area (cm<sup>2</sup>);  $dE/d\delta$  is the slope of the coulometric titration curve, found by plotting the steady state voltages  $E$  (V) measured after each titration step  $\delta$ ;  $dE/d\sqrt{t}$  is the slope of the linearized plot of the potential  $E$  (V) during the current pulse of duration  $t$  (s). If sufficiently small currents are applied for short time intervals, so that  $dE/d\sqrt{t}$  can be considered linear and the coulometric titration curve can be also considered linear over the composition range involved in that step, the above equation can be simplified into:

$$D = \frac{4}{\pi^2} \left( \frac{n_m V_m}{S} \right)^2 \left( \frac{\Delta E_s}{\Delta E_t} \right)^2$$

Here,  $\tau$  is the duration of the current pulse (s);  $n_m$  is the number of moles (mol);  $V_m$  is the molar volume of the electrode (cm<sup>3</sup> mol<sup>-1</sup>);  $S$  is the electrode/electrolyte contact area (cm<sup>2</sup>);  $\Delta E_s$  is the steady-state voltage change, due to the current pulse and  $\Delta E_t$  is the voltage change during the constant current pulse, eliminating the  $iR$  drop.

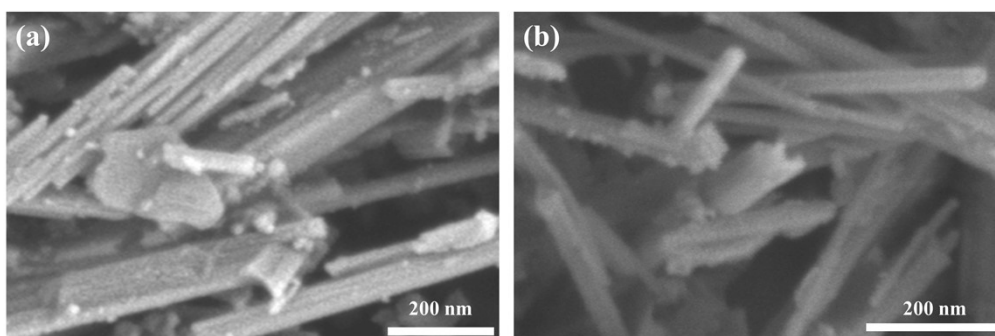

**Figure S3** SEM images of the discharged state (a). SEM images of the charged state (b).

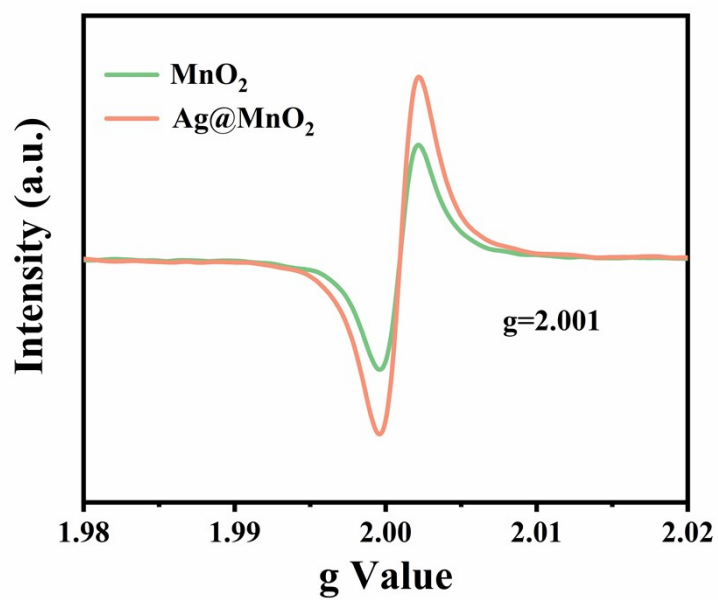

**Figure S4** EPR spectra of MnO<sub>2</sub> and Ag@MnO<sub>2</sub>.

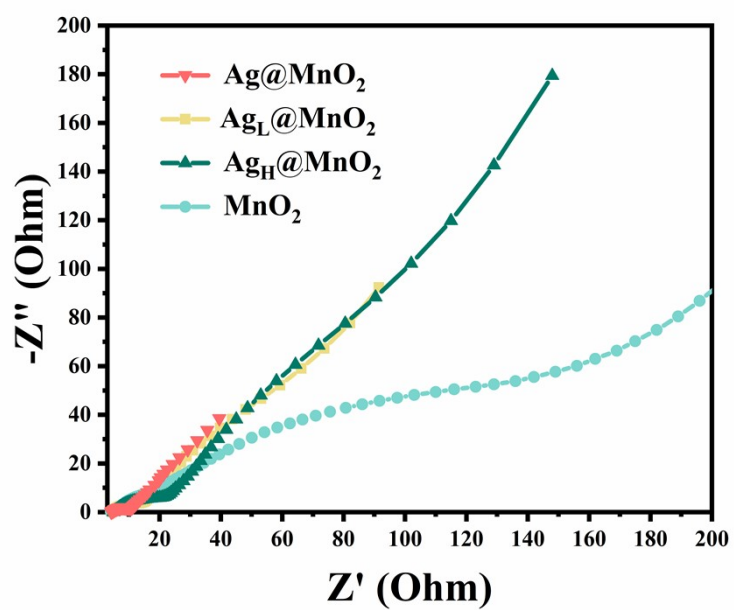

**Figure S5** Typical Nyquist plots for  $\text{MnO}_2$ ,  $\text{Ag}_L\text{@MnO}_2$ ,  $\text{Ag@MnO}_2$ , and  $\text{Ag}_H\text{@MnO}_2$  c
